# Supplementary material
Source: Research Square preprint supplement (doi:10.21203/rs.3.rs-9541731/v1)
Supplement: Supplementary file 1 [file 22a71d3d227b0c73842970ea.docx]

Beyond PAM: Digital photography and RGB color analysis as a cost-effective method for coral bleaching assessment


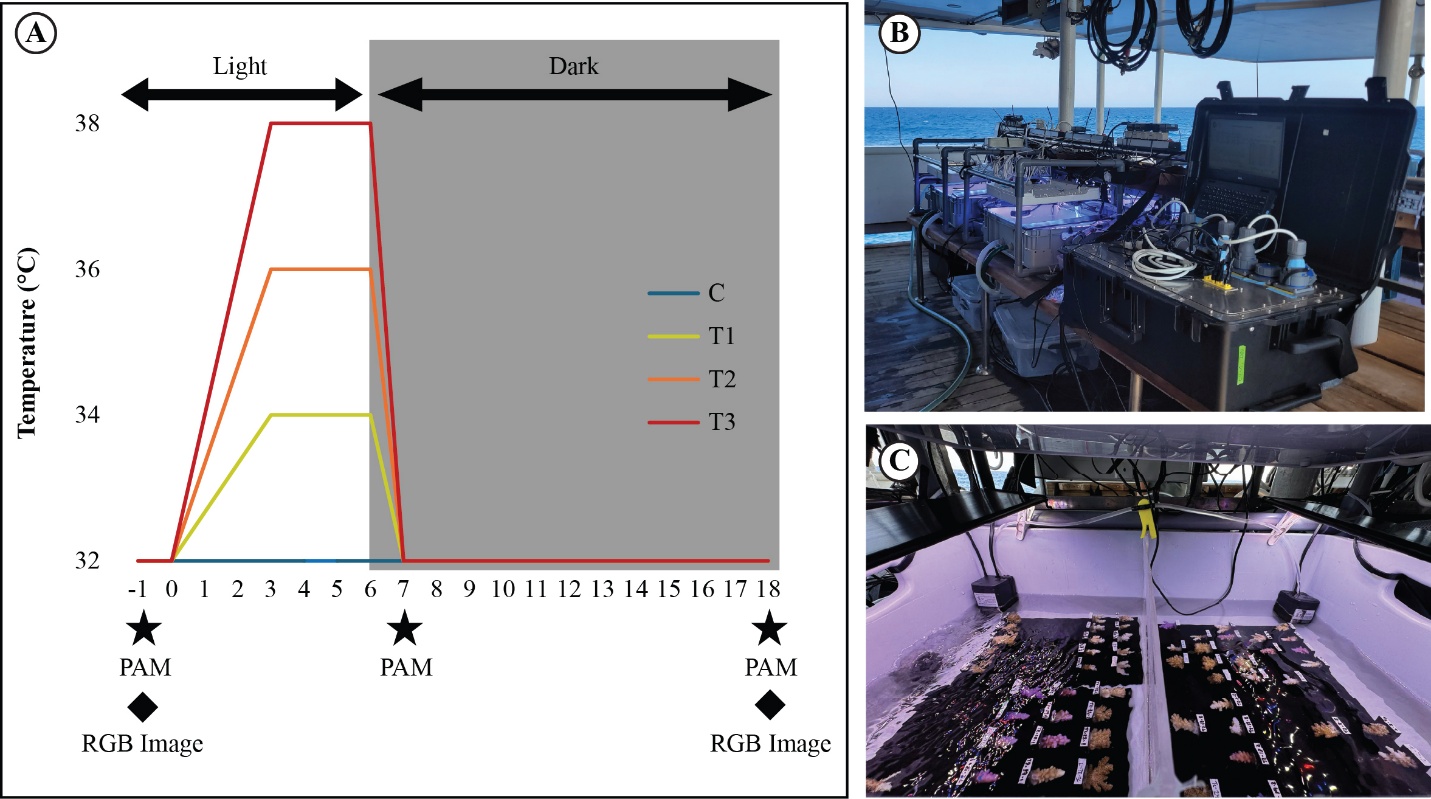


**Figure S1**. (**A**) Temperature profiles across the four treatment groups during the 18-hour acute thermal stress assay. White and gray backgrounds indicate the light (0–6 h) and dark (6–18 h) periods, respectively. Stars (★) indicate Fv/Fm measurements with the HEXAGON-IMAGING-PAM and diamonds (◆) indicate RGB image acquisition timepoints. (**B**) Overview of the modified CBASS setup deployed during the experiment. (**C**) Interior view of a representative tank showing coral fragments arranged on acrylic plates, with submersible pumps providing uniform water circulation.

**Table S1.** List of color indices used in this study (In Supplementary File 2)


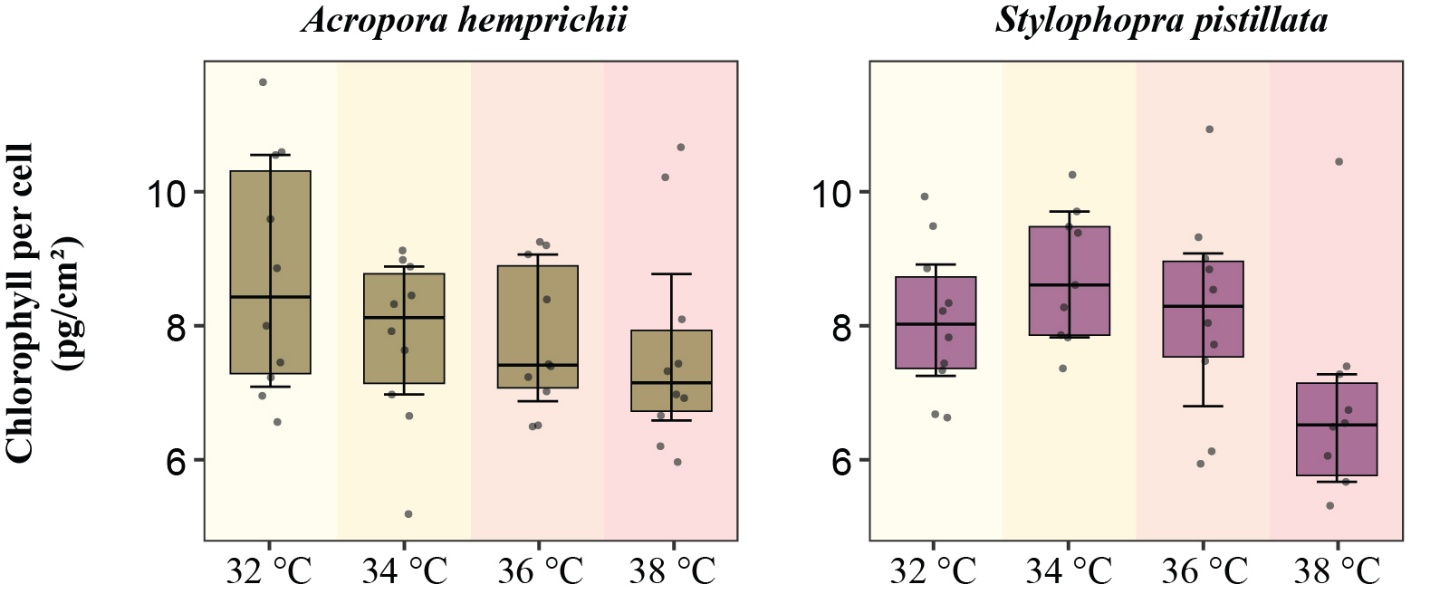


**Figure S2.** Treatment effects on total chlorophyll content per symbiont cell. Boxes represent the interquartile range (IQR) with the median line; jittered points represent individual fragments; vertical lines represent bootstrapped median 95% confidence intervals (CI). Background colors indicate treatment temperature, ranging from light yellow (32 °C, control) to light red (38 °C, highest thermal stress). Treatments did not differ significantly (Dunn test, BH-adjusted p > 0.05).


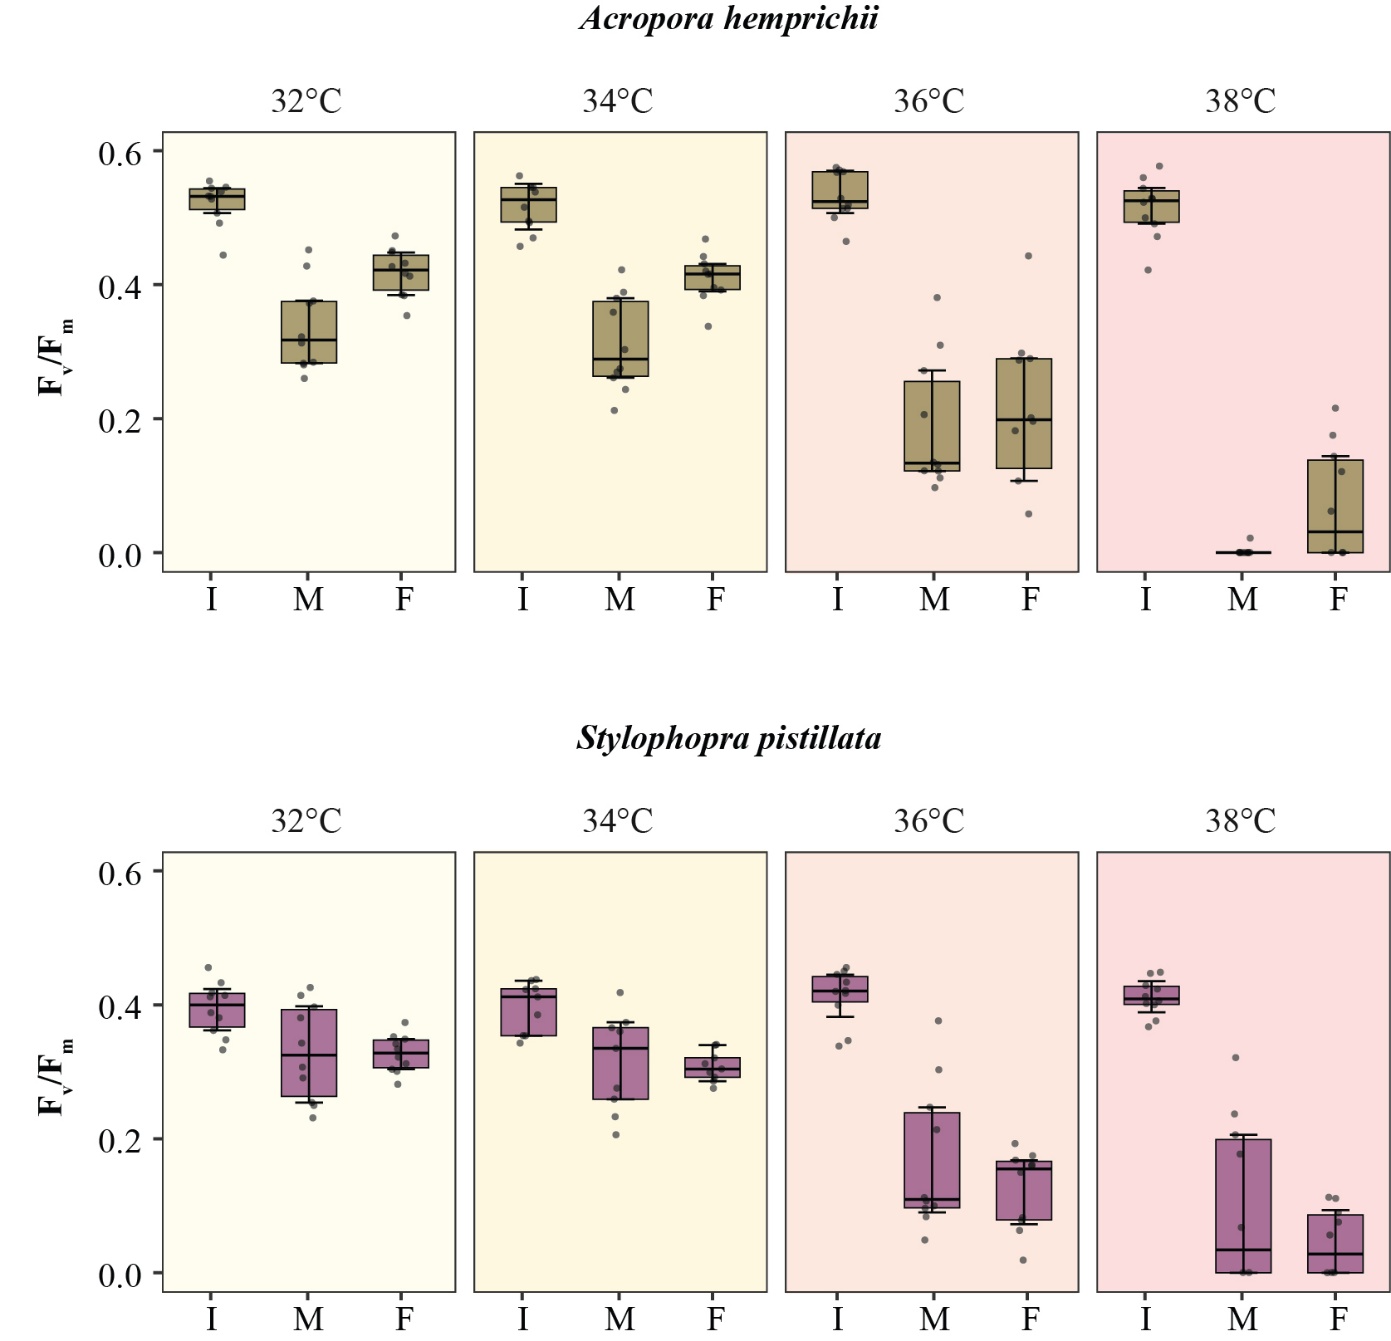


**Figure S3.** Fv/Fm trajectories across timepoints, Initial (I), Middle (M), and Final (F), per treatment. Boxes represent the interquartile range (IQR) with the median line; jittered points represent individual fragments; vertical lines represent bootstrapped median 95% confidence intervals (CI). Background colors indicate treatment temperature, ranging from light yellow (32 °C, control) to light red (38 °C, highest thermal stress). Treatments correspond to 32 °C (C), 34 °C (T1), 36 °C (T2), and 38 °C (T3).

**Table S2.** Ranking of color indices per physiological variable. (In Supplementary File 2).

**Table S3.** Ranking of color indices based on their correlation strength in symbiont density and total chlorophyll content. (In Supplementary File 2).

**Table S4.** Variance partitioning of symbiont density between D_toWhite and DeltaE76 using an RDA-based linear decomposition. Values represent adjusted R² fractions corresponding to the total variance explained by each predictor, their shared explained variance, unique contributions, and residual unexplained variance. Near-zero unique fractions indicate substantial redundancy between indices.

| Fraction | Description | Adjusted R² |
| --- | --- | --- |
| Total explained by D_toWhite | D_toWhite (alone) | 0.413 |
| Total explained by DeltaE76 | DeltaE76 (alone) | 0.423 |
| Shared fraction | D_toWhite ∩ DeltaE76 | 0.410 |
| Unique to D_toWhite | D_toWhite \ DeltaE76 | 0.002 |
| Unique to DeltaE76 | DeltaE76 \ D_toWhite | 0.012 |
| Residual | Unexplained | 0.574 |

**Table S5.** Spearman correlation matrix (ρ) showing pairwise associations among physiological metrics in A. hemprichii. Metrics include final Fv/Fm (FvFm_F), intermediate Fv/Fm at 7 h (FvFm_M), RGB-derived bleaching distance (D_toWhite_F), symbiont density, total chlorophyll content, and host protein content. Correlations were computed using pairwise complete observations.

|  | FvFm_F | FvFm_M | D_toWhite_F | Symbiont density | Total chlorophyll content | Host protein content |
| --- | --- | --- | --- | --- | --- | --- |
| FvFm_F | 1.000 |  |  |  |  |  |
| FvFm_M | 0.651 | 1.000 |  |  |  |  |
| D_toWhite_F | 0.733 | 0.477 | 1.000 |  |  |  |
| Symbiont density | 0.558 | 0.387 | 0.829 | 1.000 |  |  |
| Total chlorophyll content | 0.581 | 0.428 | 0.861 | 0.949 | 1.000 |  |
| Host protein content | 0.684 | 0.726 | 0.725 | 0.646 | 0.663 | 1.000 |

**Table S6.** Spearman correlation matrix showing pairwise associations among physiological metrics in *S. pistillata*. Metrics include final Fv/Fm (FvFm_F), intermediate Fv/Fm at 7 h (FvFm_M), RGB-derived bleaching distance (D_toWhite_F), symbiont density, total chlorophyll content, and host protein content. Correlations were computed using pairwise complete observations.

|  | FvFm_F | FvFm_M | D_toWhite_F | Symbiont density | Total chlorophyll content | Host protein content |
| --- | --- | --- | --- | --- | --- | --- |
| FvFm_F | 1.000 |  |  |  |  |  |
| FvFm_M | 0.575 | 1.000 |  |  |  |  |
| D_toWhite_F | 0.678 | 0.426 | 1.000 |  |  |  |
| Symbiont density | 0.540 | 0.543 | 0.718 | 1.000 |  |  |
| Total chlorophyll content | 0.677 | 0.571 | 0.741 | 0.933 | 1.000 |  |
| Host protein content | 0.855 | 0.587 | 0.616 | 0.505 | 0.640 | 1.000 |

**Table S7.** Spearman correlation matrix showing pairwise associations among total chlorophyll content, chlorophyll a, and chlorophyll c. Correlations were computed using pairwise complete observations.

|  | Total chlorophyll content | Chlorophyll a | Chlorophyll c |
| --- | --- | --- | --- |
| Total chlorophyll content | 1 |  |  |
| Chlorophyll a | 0.998 | 1 |  |
| Chlorophyll c | 0.993 | 0.988 | 1 |

**Table S8**. Spearman correlation matrix showing pairwise associations among Fv/Fm across timepoints. Metrics include single timepoint (Final and Middle) and the ratio of these with the initial timepoint. Correlations were computed using pairwise complete observations.

|  | FvFm_Middle | FvFm_Final | Ratio_F/I | Ratio_M/I |
| --- | --- | --- | --- | --- |
| FvFm_Middle | 1 |  |  |  |
| FvFm_Final | 0.619 | 1 |  |  |
| Ratio_F/I | 0.640 | 0.877 | 1 |  |
| Ratio_M/I | 0.949 | 0.502 | 0.629 | 1 |
