# Supplementary material
Source: Research Square preprint supplement (doi:10.21203/rs.3.rs-9541731/v1)
Supplement: Supplementary file 2 [file 9121a7b3df8a019322d1617d.xlsx]

## Sheet: Table S1
Table S1. List of color indices used in this study
Index Symbol	Name	Description	Reference(s)	Coral evidence	Color correction
D_toWhite	CIELAB Euclidean Distance to White Reference (uncorrected image)	√[(R_ref − R)² + (G_ref − G)² + (B_ref − B)²]. Euclidean distance between coral fragment and white standard in the RGB color space.			No
D_toWhite_RGB	RGB Euclidean Distance to White Reference (uncorrected image)	√[(L_ref − L)² + (a_ref − a)² + (b_ref − b)²]. Euclidean distance between coral fragment and white standard in the CIELAB color space.			No
R	Red Channel Intensity	Mean number of the red channel (0-255)	(Rigon et al. 2016; De Swaef et al. 2021; Wu et al. 2023)	(Maquire et al. 2002; Winters et al. 2009; Voolstra et al. 2020; Ferrara et al. 2026)	Yes
G	Green Channel Intensity	Mean number of the green channel (0-255)	(Rigon et al. 2016; De Swaef et al. 2021; Wu et al. 2023)	(Maquire et al. 2002; Winters et al. 2009; Ferrara et al. 2026)	Yes
B	Blue Channel Intensity	Mean number of the blue channel (0-255)	(De Swaef et al. 2021; Wu et al. 2023)	(Maquire et al. 2002; Winters et al. 2009; Ferrara et al. 2026)	Yes
r (normalized)	Normalised Red	r = R / (R + G + B). Proportion of total intensity in the red channel.	(Rigon et al. 2016; De Swaef et al. 2021; Wu et al. 2023; Zolin et al. 2025)	(Ferrara et al. 2026)	Yes
g (normalized)	Normalised Green	g = G / (R + G + B). Proportion of total intensity in the green channel.	(Wei Quan-quan et al. 2015; De Swaef et al. 2021; Wu et al. 2023; Zolin et al. 2025)	(Ferrara et al. 2026)	Yes
b (normalized)	Normalised Blue	b = B / (R + G + B). Proportion of total intensity in the blue channel.	(Kawashima and Nakatani 1998; De Swaef et al. 2021; Wu et al. 2023; Zolin et al. 2025)	(Ferrara et al. 2026)	Yes
Grayscale_weight	Weighted grayscale intensity (luminance)	0.299R + 0.587G + 0.114B. ITU-R BT.601 perceptual luminance approximation weighting channels by human photopic sensitivity.	(Güneş et al. 2016)	(Chow et al. 2016; Ferrara et al. 2026)	Yes
Grayscale_norm	Normalised Grayscale	r·R + g·G + b·B. Grayscale computed by weighting each channel by its own normalised proportion.	(Güneş et al. 2016)		Yes
INT	Mean RGB Intensity	(R + G + B) / 3. Arithmetic mean of all three channels	(Wu et al. 2023)	(Chow et al. 2016)	Yes
R+G	Red–Green Sum	R + G. Sum of red and green channels	(Hu et al. 2010; Ali et al. 2012)	(Ferrara et al. 2026)	Yes
R+B	Red–Blue Sum	R + B. Sum of red and blue channels.	(Hu et al. 2010)	(Ferrara et al. 2026)	Yes
R−G	Red minus Green	R − G. Difference of red and green channels.	(De Swaef et al. 2021)	(Ferrara et al. 2026)	Yes
R−B	Red minus Blue	R − B. Difference of red and blue channels.	(Kawashima and Nakatani 1998; Ku et al. 2004; Wang et al. 2010)	(Ferrara et al. 2026)	Yes
G−B	Green minus Blue	G − B. Difference of green and blue channels.	(Kawashima and Nakatani 1998; Ku et al. 2004; De Swaef et al. 2021)		Yes
g−r	Normalised Green minus Red	g−r. Difference of normalised green and red channels.	(Widjaja Putra and Soni 2018)		Yes
g−b	Normalised Green minus Blue	g−b. Difference of normalised green and blue channels.	(Liu et al. 2023)		Yes
r−b	Normalised Red minus Blue	r−b. Difference of normalised red and blue channels.	(Kawashima and Nakatani 1998)		Yes
NGRI	Normalized Green-Red Index (NGRI) also known as Green vegetation Index	(G − R) / (G + R). Symmetric normalised ratio contrasting green and red channels.	(Hunt et al. 2013; Widjaja Putra and Soni 2018; De Swaef et al. 2021; Wu et al. 2023)	(Ferrara et al. 2026)	Yes
NRBI	Normalized Red-Blue Index (NRBI)	(R − B) / (R + B). Symmetric normalised ratio contrasting red and blue channels.	(Kawashima and Nakatani 1998; Wang et al. 2010; De Swaef et al. 2021; Wu et al. 2023)	(Ferrara et al. 2026)	Yes
NGBI	Normalized Green-Blue Index (NGBI)	(G − B) / (G + B). Symmetric normalised ratio contrasting green and blue channels.	(De Swaef et al. 2021)	(Ferrara et al. 2026)	Yes
KI	Ku’s Index	R / (R − B).	(Ku et al. 2004)		Yes
Distance	RGB Euclidean Distance to White Reference	√[(R_ref − R)² + (G_ref − G)² + (B_ref − B)²]. Euclidean distance between coral fragment and white standard in the RGB color space.			Yes
VEG	Vegetative Index	G / (R^0.667 · B^0.333). Designed to be insensitive to illumination angle; emphasises greenness.	(De Swaef et al. 2021; Wu et al. 2023; Zolin et al. 2025)		Yes
ExR	Excess Red Index	1.4r − g. Captures redness relative to normalised green.	(George E. Meyer et al. 1999; De Swaef et al. 2021; Wu et al. 2023)		Yes
ExG	Excess Green Index	2G − R − B. Separates green vegetation from background.	(De Swaef et al. 2021; Zolin et al. 2025)		Yes
ExG_2	Normalised Excess Green	(2G − R − B) / (R + G + B). Illumination-normalised form of ExG.	(De Swaef et al. 2021)		Yes
ExB	Excess Blue Index	1.4b − g. Captures blue dominance.	(Wu et al. 2023)		Yes
ExGR	Excess Green minus Excess Red (raw)	(2G − R − B) − (1.4r − g). Combines ExG and ExR to enhance discrimination of green tissue from reddened or pale backgrounds.	(Wu et al. 2023)		Yes
ExGR_2	Excess Green minus Excess Red (normalised)	[(2G − R − B)/(R+G+B)] − (1.4r − g). Normalised variant of ExGR.	(De Swaef et al. 2021)		Yes
SAVI	Soil Adjusted Vegetation Index Green	1.5(g − r) / (g + r + 0.5). Originally accounts for soil brightness in sparse canopies.	(Widjaja Putra and Soni 2018)		Yes
OSAVI	Optimized Soil Adjusted Vegetation Index Green	1.5(g − r) / (g + r + 0.16). Reduces the need to optimise L empirically.	(Widjaja Putra and Soni 2018)		Yes
EVI	Enhanced Vegetation Index Green	2.5(g − r) / (g + 6r − 7.5b + 1). Three-band index designed to reduce atmospheric and background noise.	(Widjaja Putra and Soni 2018)		Yes
EVI_2	Enhanced Vegetation Index 2 Green	2.5(g − r) / (g + 2.4r + 1). Two-band approximation of EVI requiring no blue channel.	(Widjaja Putra and Soni 2018)		Yes
VDVI	Visible-band difference vegetation Index also refered as Green Leaf Index 1 (GLI1)	(2G − R − B) / (2G + R + B). Ratio form of ExG; range [−1, 1].	(Hunt et al. 2013; De Swaef et al. 2021; Wu et al. 2023)		Yes
GLI2	Green Leaf Index 2 (modified)	(2G − R + B) / (2G + R + B). Modified form of GLI in which the blue channel is added (rather than subtracted) in the numerator.	(Wu et al. 2023)		Yes
VARI	Visible Atmospherically Resistant Index	(G − R) / (G + R − B). Reduces illumination effects by incorporating the blue channel in the denominator.	(Hunt et al. 2013; Widjaja Putra and Soni 2018; De Swaef et al. 2021; Wu et al. 2023; Zolin et al. 2025)	(Ferrara et al. 2026)	Yes
MGRVI	Modified Green–Red Vegetation Index	(G² − R²) / (G² + R²). Squared-channel form of NGRI.	(De Swaef et al. 2021; Wu et al. 2023)		Yes
CIVE_raw	Colour Index of Vegetation Extraction (raw)	0.441R − 0.881G + 0.385B + 18.787. Empirically derived linear combination maximising separation of vegetation from bare soil.	(De Swaef et al. 2021)		Yes
CIVE_norm	Colour Index of Vegetation Extraction (normalised)	0.441r − 0.811g + 0.3856b + 18.79. Normalised-channel variant of CIVE.	(Wu et al. 2023)		Yes
WI	Woebbecke Hue Index	(G − B) / (R − G). Ratio approximating the hue angle in the RGB plane.	(De Swaef et al. 2021)		Yes
WI_modified	Woebbecke Green Ratio (alt.)	(G − B) / (G + R). Alternative normalisation of the green–blue contrast.	(Wu et al. 2023)		Yes
NDI	Normalized Difference Index	(r − g) / (r + g + 0.01). Normalised red–green difference with a small offset (0.01) to prevent division by zero.	(Widjaja Putra and Soni 2018; Wu et al. 2023)		Yes
redness_Index	Redness Index	R² / (G · B). Amplifies red dominance non-linearly.	(Roskin et al. 2012)		Yes
chroma_Index	RGB Chroma Index	√[(R−G)² + (R−B)² + (G−B)²]. Total pairwise colour difference among channels; a measure of colour saturation in RGB space.	-		Yes
hue_angle	Hue Angle (RGB-derived)	atan2[√3·(G − B), 2R − G − B] (radians). Opponent-colour hue angle in the plane of the RGB cube.	(Foley 1996)		Yes
COM_raw	Composite Vegetation Index (raw)	0.25·ExG + 0.30·ExGR + 0.33·CIVE_raw + 0.12·VEG. Weighted combination of four complementary vegetation indices designed to improve plant segmentation over any single index.	(Wu et al. 2023)		Yes
COM_norm	Composite Vegetation Index (normalised)	0.25·ExG + 0.30·ExGR_2 + 0.33·CIVE_norm + 0.12·VEG. Normalised-channel variant of COM.	(Wu et al. 2023)		Yes
ChOL	Chlorophyll estimation by Optileaf	logistic[(G − R/3 − B/3) / 255]. Applies the logistic (sigmoid) function to a green-dominant channel combination scaled to [0, 1].	(Ali et al. 2012)		Yes
IPCA	Image Processing for Colour Agriculture Index	0.994|R − B| + 0.961|G − B| + 0.914|G − R|. Weighted sum of absolute channel pairwise differences; empirically optimised for crop segmentation.	(Wu et al. 2023)		Yes
RGBVI	RGB Vegetation Index	(G² − B·R) / (G² + B·R). Ratio of quadratic channel combinations; range [−1, 1]; correlated with plant biomass.	(Wu et al. 2023)		Yes
H_hsv	Hue (HSV)	Hue component of the HSV (Hue–Saturation–Value) colour model (0–360°). Encodes dominant wavelength.	(Smith 1978)		Yes
S_hsv	Saturation (HSV)	Saturation component of the HSV model: (max − min) / max. Quantifies colour purity.	(Smith 1978)		Yes
V_hsv	Value / Brightness (HSV)	Value component of the HSV model: max(R, G, B) / 255. Overall brightness.	(Smith 1978)		Yes
F_PC1	RGB Principal Component 1	First principal component score from PCA of scaled R, G, B channels. Typically captures the dominant axis of luminance variation across samples.		(Edmunds et al. 2003; Hackerott et al. 2025)	Yes
F_PC2	RGB Principal Component 2	Second principal component score from PCA of scaled R, G, B channels. Typically captures the dominant axis of chrominance (hue) variation.			Yes
L_index	CIELAB Lightness	Perceptual lightness in the CIELAB (CIE L*a*b*) colour space (0 = black, 100 = white).	(McLaren 1976)		Yes
a_index	CIELAB Green–Red Axis	Opponent green–red chromaticity coordinate in CIELAB (negative = green, positive = red).	(McLaren 1976)		Yes
b_index	CIELAB Blue–Yellow Axis	Opponent blue–yellow chromaticity coordinate in CIELAB (negative = blue, positive = yellow).	(McLaren 1976)		Yes
C_index	CIELAB Chroma	√(a*² + b*²). Perceptual colourfulness (saturation in CIELAB); zero for achromatic (white/grey) stimuli.	(McLaren 1976)		Yes
DeltaE76	CIE76 Colour Difference to White Reference	√[(ΔL*)² + (Δa*)² + (Δb*)²] between coral fragment and co-photographed white standard in CIELAB space. Euclidean distance in a near-uniform perceptual space.	(McLaren 1976)		Yes
DeltaE2000	CIEDE2000 Colour Difference to White Reference	Perceptually-weighted colour difference between coral fragment and white standard, computed with the CIEDE2000 formula including corrections for lightness, chroma, and hue weighting, as well as an interaction term (R_T) for blue-region hues.	(Sharma et al. 2005)		Yes
References Ali M, Al-Ani A, Eamus D, Tan D (2012) A New Image Processing Based Technique to Determine Chlorophyll in Plants. Am-Eurasian J Agric Env Sci 12:1323–1328 Chow MH, Tsang RHL, Lam EKY, Ang P (2016) Quantifying the degree of coral bleaching using digital photographic technique. J Exp Mar Biol Ecol 479:60–68 De Swaef T, Maes WH, Aper J, Baert J, Cougnon M, Reheul D, Steppe K, Roldán-Ruiz …

## Sheet: Table S2
Table S2. Ranking of color indices per physiological variable.
Rank	Index	Outcome	p_spearman	p_value	p_adj_BH	Species
1	DeltaE2000	Symbiont density	0.844465	0	3.197e-09	Acropora hemprichii
2	G_index	Symbiont density	-0.841839	0	1.05639e-09	Acropora hemprichii
3	OSAVI	Symbiont density	-0.839962	0	3.0783e-10	Acropora hemprichii
4	Grayscale_weight	Symbiont density	-0.839962	0	1.05639e-09	Acropora hemprichii
5	NDI	Symbiont density	0.839212	0	3.0783e-10	Acropora hemprichii
6	NGRI	Symbiont density	-0.839212	0	3.0783e-10	Acropora hemprichii
7	MGRVI	Symbiont density	-0.839212	0	4.02477e-10	Acropora hemprichii
8	L_index	Symbiont density	-0.837899	0	1.05639e-09	Acropora hemprichii
9	R_plus_G	Symbiont density	-0.837336	0	1.05639e-09	Acropora hemprichii
10	SAVI	Symbiont density	-0.836773	0	3.0783e-10	Acropora hemprichii
11	EVI_2	Symbiont density	-0.836773	0	3.0783e-10	Acropora hemprichii
12	D_toWhite_RGB	Symbiont density	0.833771	0	1.23347e-09	Acropora hemprichii
13	Distance	Symbiont density	0.832458	0	1.24683e-09	Acropora hemprichii
14	F_PC1	Symbiont density	-0.831707	0	1.23347e-09	Acropora hemprichii
15	int	Symbiont density	-0.831707	0	1.23347e-09	Acropora hemprichii
16	DeltaE76	Symbiont density	0.829831	0	1.05639e-09	Acropora hemprichii
17	D_toWhite	Symbiont density	0.829268	0	1.05639e-09	Acropora hemprichii
18	g_minus_r	Symbiont density	-0.827392	0	3.0783e-10	Acropora hemprichii
19	ExR	Symbiont density	0.826829	0	3.66753e-10	Acropora hemprichii
20	R_plus_B	Symbiont density	-0.825516	0	1.88471e-09	Acropora hemprichii
21	Grayscale_norm	Symbiont density	-0.822514	1.84758e-10	1.23347e-09	Acropora hemprichii
22	ChOL	Symbiont density	-0.821201	1.77419e-09	5.87865e-09	Acropora hemprichii
23	VARI	Symbiont density	-0.819325	4.14458e-09	1.24683e-09	Acropora hemprichii
24	GLI2	Symbiont density	-0.816886	7.40592e-09	6.34724e-10	Acropora hemprichii
25	ExGR_2	Symbiont density	-0.812008	1.45631e-08	6.37876e-10	Acropora hemprichii
26	R_index	Symbiont density	-0.807692	2.16367e-08	1.27824e-09	Acropora hemprichii
27	V_hsv	Symbiont density	-0.807692	2.16367e-08	1.27824e-09	Acropora hemprichii
28	B_index	Symbiont density	-0.804315	2.76871e-08	1.27349e-08	Acropora hemprichii
29	r_norm	Symbiont density	0.793996	4.92419e-08	2.08759e-09	Acropora hemprichii
30	redness_index	Symbiont density	0.78743	6.56713e-08	7.77471e-09	Acropora hemprichii
31	r_minus_b	Symbiont density	0.734897	3.67733e-07	1.32555e-07	Acropora hemprichii
32	S_hsv	Symbiont density	0.706191	1.01768e-06	6.77482e-07	Acropora hemprichii
33	NRBI	Symbiont density	0.706191	1.01768e-06	8.87258e-07	Acropora hemprichii
34	KI	Symbiont density	-0.706191	1.01768e-06	8.07382e-05	Acropora hemprichii
35	EVI	Symbiont density	-0.703002	1.15045e-06	5.3266e-07	Acropora hemprichii
36	H_hsv	Symbiont density	-0.675985	3.38114e-06	0.00705717	Acropora hemprichii
37	CIVE_norm	Symbiont density	0.670356	4.24478e-06	1.81156e-07	Acropora hemprichii
38	VEG	Symbiont density	-0.669418	4.40851e-06	6.39449e-07	Acropora hemprichii
39	VDVI	Symbiont density	-0.649719	9.66239e-06	9.37914e-07	Acropora hemprichii
40	g_norm	Symbiont density	-0.649719	9.66239e-06	1.02317e-06	Acropora hemprichii
41	ExG_2	Symbiont density	-0.649719	9.66239e-06	1.02317e-06	Acropora hemprichii
42	b_norm	Symbiont density	-0.631144	1.97007e-05	2.61681e-05	Acropora hemprichii
43	a_index	Symbiont density	0.590807	8.22529e-05	8.98371e-05	Acropora hemprichii
44	CIVE_raw	Symbiont density	0.491932	0.00144294	0.00153849	Acropora hemprichii
45	R_minus_G	Symbiont density	0.442589	0.00458325	0.0064672	Acropora hemprichii
46	RGBVI	Symbiont density	-0.398874	0.0112834	0.0064672	Acropora hemprichii
47	Chroma_index	Symbiont density	0.375797	0.0174115	0.0283714	Acropora hemprichii
48	ExB	Symbiont density	-0.365103	0.0210941	0.0237364	Acropora hemprichii
49	NGBI	Symbiont density	0.328143	0.0392429	0.0518234	Acropora hemprichii
50	g_minus_b	Symbiont density	0.270919	0.0909917	0.133528	Acropora hemprichii
51	WI_modified	Symbiont density	0.238086	0.138772	0.159735	Acropora hemprichii
52	COM_norm	Symbiont density	-0.221576	0.168933	0.129367	Acropora hemprichii
53	ExGR	Symbiont density	-0.221576	0.168933	0.136141	Acropora hemprichii
54	ExG	Symbiont density	-0.211257	0.190056	0.149244	Acropora hemprichii
55	chroma_index	Symbiont density	0.185178	0.251675	0.396816	Acropora hemprichii
56	COM_raw	Symbiont density	-0.168105	0.298641	0.396816	Acropora hemprichii
57	WI	Symbiont density	-0.165666	0.305786	0.421317	Acropora hemprichii
58	hue_angle	Symbiont density	-0.165666	0.305786	0.859442	Acropora hemprichii
59	R_minus_B	Symbiont density	0.140901	0.38448	0.421317	Acropora hemprichii
60	IPCA	Symbiont density	0.125891	0.437523	0.58604	Acropora hemprichii
61	b_index	Symbiont density	0.0996248	0.539484	0.421317	Acropora hemprichii
62	F_PC2	Symbiont density	-0.0876173	0.589651	0.511465	Acropora hemprichii
63	G_minus_B	Symbiont density	-0.0744841	0.646787	0.731224	Acropora hemprichii
1	DeltaE2000	Total Chlorophyll content	0.879174	0	6.75487e-11	Acropora hemprichii
2	Grayscale_weight	Total Chlorophyll content	-0.874109	0	2.5131e-11	Acropora hemprichii
3	G_index	Total Chlorophyll content	-0.871295	0	2.5131e-11	Acropora hemprichii
4	L_index	Total Chlorophyll content	-0.871107	0	2.18924e-11	Acropora hemprichii
5	R_plus_G	Total Chlorophyll content	-0.871107	0	2.18924e-11	Acropora hemprichii
6	F_PC1	Total Chlorophyll content	-0.869043	0	3.85113e-11	Acropora hemprichii
7	int	Total Chlorophyll content	-0.867917	0	4.06918e-11	Acropora hemprichii
8	R_index	Total Chlorophyll content	-0.866604	0	2.18924e-11	Acropora hemprichii
9	V_hsv	Total Chlorophyll content	-0.866604	0	2.18924e-11	Acropora hemprichii
10	Distance	Total Chlorophyll content	0.865854	0	4.17446e-11	Acropora hemprichii
11	Grayscale_norm	Total Chlorophyll content	-0.864728	0	2.5131e-11	Acropora hemprichii
12	D_toWhite_RGB	Total Chlorophyll content	0.862852	0	4.1494e-11	Acropora hemprichii
13	DeltaE76	Total Chlorophyll content	0.861726	0	3.85113e-11	Acropora hemprichii
14	R_plus_B	Total Chlorophyll content	-0.861726	0	6.97468e-11	Acropora hemprichii
15	D_toWhite	Total Chlorophyll content	0.861163	0	3.85113e-11	Acropora hemprichii
16	ChOL	Total Chlorophyll content	-0.84334	0	6.75487e-11	Acropora hemprichii
17	NGRI	Total Chlorophyll content	-0.84015	0	3.85113e-11	Acropora hemprichii
18	NDI	Total Chlorophyll content	0.84015	0	3.85113e-11	Acropora hemprichii
19	MGRVI	Total Chlorophyll content	-0.84015	0	4.11168e-11	Acropora hemprichii
20	OSAVI	Total Chlorophyll content	-0.838649	0	4.06918e-11	Acropora hemprichii
21	SAVI	Total Chlorophyll content	-0.835272	0	4.17446e-11	Acropora hemprichii
22	EVI_2	Total Chlorophyll content	-0.835272	0	4.17446e-11	Acropora hemprichii
23	g_minus_r	Total Chlorophyll content	-0.829268	0	6.97468e-11	Acropora hemprichii
24	ExR	Total Chlorophyll content	0.827955	0	1.62947e-10	Acropora hemprichii
25	VARI	Total Chlorophyll content	-0.816135	8.4512e-09	4.17446e-11	Acropora hemprichii
26	B_index	Total Chlorophyll content	-0.81576	8.98133e-09	4.32469e-09	Acropora hemprichii
27	GLI2	Total Chlorophyll content	-0.811445	1.54453e-08	7.24788e-10	Acropora hemprichii
28	ExGR_2	Total Chlorophyll content	-0.808818	1.97218e-08	4.398e-11	Acropora hemprichii
29	r_norm	Total Chlorophyll content	0.778236	9.29619e-08	9.62358e-09	Acropora hemprichii
30	redness_index	Total Chlorophyll content	0.772795	1.11975e-07	1.6178e-07	Acropora hemprichii
31	EVI	Total Chlorophyll content	-0.732083	4.03359e-07	1.48119e-08	Acropora hemprichii
32	r_minus_b	Total Chlorophyll content	0.721013	5.89287e-07	8.39591e-07	Acropora hemprichii
33	H_hsv	Total Chlorophyll content	-0.69925	1.33143e-06	0.00559579	Acropora hemprichii
34	VEG	Total Chlorophyll content	-0.698499	1.3712e-06	2.3098e-08	Acropora hemprichii
35	CIVE_norm	Total Chlorophyll content	0.698311	1.38134e-06	1.07919e-08	Acropora hemprichii
36	S_hsv	Total Chlorophyll content	0.686116	2.24555e-06	3.19339e-06	Acropora hemprichii
37	NRBI	Total Chlorophyll content	0.686116	2.24555e-06	5.39768e-06	Acropora hemprichii
38	KI	Total Chlorophyll content	-0.686116	2.24555e-06	0.000111782	Acropora hemprichii
39	VDVI	Total Chlorophyll content	-0.681051	2.75479e-06	6.33078e-08	Acropora hemprichii
40	g_norm	Total Chlorophyll content	-0.681051	2.75479e-06	6.78848e-08	Acropora hemprichii
41	ExG_2	Total Chlorophyll content	-0.681051	2.75479e-06	6.78848e-08	Acropora hemprichii
42	b_norm	Total Chlorophyll content	-0.611257	4.06924e-05	0.000166508	Acropora hemprichii
43	a_index	Total Chlorophyll content	0.573358	0.000145093	8.78463e-05	Acropora hemprichii
44	CIVE_raw	Total Chlorophyll content	0.508443	0.000944779	0.000340119	Acropora hemprichii
45	RGBVI	Total Chlorophyll content	-0.43546	0.00534838	0.000882959	Acropora hemprichii
46	R_minus_G	Total Chlorophyll content	0.361538	0.022459	0.0235309	Acropora hemprichii
47	ExB	Total Chlorophyll content	-0.319137	0.0452178	0.0752441	Acropora hemprichii
48	Chroma_index	Total Chlorophyll content	0.301689	0.058904	0.115615	Acropora hemprichii
49	NGBI	Total Chlorophyll content	0.282364	0.0777573	0.151537	Acropora hemprichii
50	COM_norm	Total Chlorophyll content	-0.244278	0.128565	0.0676027	Acropora hemprichii
51	ExGR	Total Chlorophyll content	-0.244278	0.128565	0.0736625	Acropora hemprichii
52	ExG	Total Chlorophyll content	-0.236585	0.141335	0.0802111	Acropora hemprichii
53	g_minus_b	Total Chlorophyll content	0.227955	0.15676	0.295978	Acropora hemprichii
54	WI	Total Chlorophyll content	-0.211445	0.189656	0.238056	Acropora hemprichii
55	hue_angle	Total Chlorophyll content	-0.211445	0.189656	0.620379	Acropora hemprichii
56	WI_modified	Total Chlorophyll content	0.191745	0.235021	0.346914	Acropora hemprichii
57	COM_raw	Total Chlorophyll content	-0.190244	0.238759	0.252224	Acropora hemprichii
58	F_PC2	Total Chlorophyll content	-0.172795	0.285208	0.198464	Acropora hemprichii
59	G_minus_B	Total Chlorophyll content	-0.141088	0.383842	0.402678	Acropora hemprichii
60	chroma_index	Total Chlorophyll content	0.0797373	0.623665	0.832009	Acropora hemprichii
61	R_minus_B	Total Chlorophyll content	0.0448405	0.78297	0.851083	Acropora hemprichii
62	IPCA	Total Chlorophyll content	0.027955	0.863856	0.891783	Acropora hemprichii
63	b_index	Total Chlorophyll content	0.0242026	0.882051	0.783992	Acropora hemprichii
1	EVI	FvFm	-0.796881	7.67134e-10	8.52929e-10	Acropora hemprichii
2	ExG_2	FvFm	-0.789552	1.40404e-09	5.15557e-09	Acropora hemprichii
3	g_norm	FvFm	-0.789552	1.40404e-09	5.15557e-09	Acropora hemprichii
4	VDVI	FvFm	-0.789552	1.40404e-09	6.21426e-09	Acropora hemprichii
5	CIVE_norm	FvFm	0.7888	1.49183e-09	2.40198e-09	Acropora hemprichii
6	ExGR_2	FvFm	-0.778651	3.30563e-09	8.52929e-10	Acropora hemprichii
7	VEG	FvFm	-0.772261	5.34193e-09	5.27405e-09	Acropora hemprichii
8	ChOL	FvFm	-0.771603	5.60758e-09	8.52929e-10	Acropora hemprichii
9	VARI	FvFm	-0.771415	5.68572e-09	1.5249e-09	Acropora hemprichii
10	a_index	FvFm	0.767092	7.78862e-09	8.52929e-10	Acropora hemprichii
11	G_index	FvFm	-0.746324	3.23346e-08	8.67431e-08	Acropora hemprichii
12	MGRVI	FvFm	-0.742378	4.17353e-08	4.65034e-09	Acropora hemprichii
13	NGRI	FvFm	-0.742378	4.17353e-08	5.15557e-09	Acropora hemprichii
14	NDI	FvFm	0.742378	4.17353e-08	5.15557e-09	Acropora hemprichii
15	OSAVI	FvFm	-0.741438	4.43201e-08	5.15557e-09	Acropora hemprichii
16	EVI_2	FvFm	-0.739277	5.08399e-08	5.17973e-09	Acropora hemprichii
17	SAVI	FvFm	-0.739277	5.08399e-08	5.17973e-09	Acropora hemprichii
18	g_minus_r	FvFm	-0.737679	5.62197e-08	7.82093e-09	Acropora hemprichii
19	L_index	FvFm	-0.735236	6.54784e-08	1.88737e-07	Acropora hemprichii
20	DeltaE2000	FvFm	0.735142	6.58613e-08	2.83566e-07	Acropora hemprichii
21	Grayscale_weight	FvFm	-0.732887	7.56983e-08	2.83566e-07	Acropora hemprichii
22	D_toWhite	FvFm	0.732511	7.74646e-08	2.68598e-07	Acropora hemprichii
23	R_plus_G	FvFm	-0.731947	8.0186e-08	2.20763e-07	Acropora hemprichii
24	Grayscale_norm	FvFm	-0.730067	8.99113e-08	1.04002e-06	Acropora hemprichii
25	D_toWhite_RGB	FvFm	0.725651	1.17234e-07	8.8762e-07	Acropora hemprichii
26	DeltaE76	FvFm	0.723583	1.32508e-07	4.81259e-07	Acropora hemprichii
27	V_hsv	FvFm	-0.722174	1.43958e-07	6.283e-07	Acropora hemprichii
28	R_index	FvFm	-0.722174	1.43958e-07	6.283e-07	Acropora hemprichii
29	ExR	FvFm	0.72208	1.44753e-07	2.76318e-08	Acropora hemprichii
30	int	FvFm	-0.721516	1.49609e-07	1.17372e-06	Acropora hemprichii
31	F_PC1	FvFm	-0.720952	1.54616e-07	9.80553e-07	Acropora hemprichii
32	R_plus_B	FvFm	-0.699245	5.18514e-07	4.83239e-06	Acropora hemprichii
33	GLI2	FvFm	-0.698869	5.28997e-07	2.20763e-07	Acropora hemprichii
34	CIVE_raw	FvFm	0.697741	5.61635e-07	5.50355e-09	Acropora hemprichii
35	Distance	FvFm	0.697083	5.81523e-07	2.36283e-06	Acropora hemprichii
36	B_index	FvFm	-0.695862	6.20193e-07	5.18379e-05	Acropora hemprichii
37	r_norm	FvFm	0.694076	6.81001e-07	1.5641e-06	Acropora hemprichii
38	redness_index	FvFm	0.677819	1.54934e-06	1.90995e-06	Acropora hemprichii
39	r_minus_b	FvFm	0.629987	1.3251e-05	8.59091e-05	Acropora hemprichii
40	H_hsv	FvFm	-0.619838	1.99654e-05	0.456923	Acropora hemprichii
41	NRBI	FvFm	0.582626	7.99589e-05	0.000336103	Acropora hemprichii
42	S_hsv	FvFm	0.582626	7.99589e-05	0.00045518	Acropora hemprichii
43	KI	FvFm	-0.582626	7.99589e-05	0.0442026	Acropora hemprichii
44	R_minus_G	FvFm	0.573886	0.000108125	9.64309e-05	Acropora hemprichii
45	RGBVI	FvFm	-0.533572	0.000391937	0.000143961	Acropora hemprichii
46	COM_norm	FvFm	-0.531411	0.000418067	2.26561e-05	Acropora hemprichii
47	ExGR	FvFm	-0.531411	0.000418067	2.64412e-05	Acropora hemprichii
48	ExG	FvFm	-0.523047	0.00053451	3.36521e-05	Acropora hemprichii
49	b_norm	FvFm	-0.501058	0.000990357	0.00562971	Acropora hemprichii
50	COM_raw	FvFm	-0.476343	0.00188912	0.000445034	Acropora hemprichii
51	WI	FvFm	-0.461966	0.00269226	0.000937119	Acropora hemprichii
52	hue_angle	FvFm	-0.461966	0.00269226	0.0139342	Acropora hemprichii
53	G_minus_B	FvFm	-0.369403	0.0189823	0.0137098	Acropora hemprichii
54	F_PC2	FvFm	-0.325331	0.0405185	0.0174145	Acropora hemprichii
55	Chroma_index	FvFm	0.234648	0.145	0.25869	Acropora hemprichii
56	ExB	FvFm	-0.187286	0.247185	0.412123	Acropora hemprichii
57	NGBI	FvFm	0.160128	0.323636	0.45328	Acropora hemprichii
58	b_index	FvFm	-0.131655	0.418063	0.376912	Acropora hemprichii
59	g_minus_b	FvFm	0.0898371	0.581442	0.897612	Acropora hemprichii
60	IPCA	FvFm	-0.0812857	0.618047	0.459756	Acropora hemprichii
61	R_minus_B	FvFm	-0.0730161	0.654334	0.56617	Acropora hemprichii
62	WI_modified	FvFm	0.0357093	0.826842	0.897612	Acropora hemprichii
63	chroma_index	FvFm	-0.00770569	0.962362	0.810192	Acropora hemprichii
1	EVI	Host protein content	-0.828518	0	8.27705e-07	Acropora hemprichii
2	VARI	Host protein content	-0.82833	0	8.27705e-07	Acropora hemprichii
3	ChOL	Host protein content	-0.82758	0	1.03031e-06	Acropora hemprichii
4	ExGR_2	Host protein content	-0.826642	0	9.63897e-07	Acropora hemprichii
5	CIVE_norm	Host protein content	0.818386	5.3746e-09	9.63897e-07	Acropora hemprichii
6	VEG	Host protein content	-0.812195	1.42717e-08	9.63897e-07	Acropora hemprichii
7	g_norm	Host protein content	-0.806942	2.29413e-08	1.03031e-06	Acropora hemprichii
8	ExG_2	Host protein content	-0.806942	2.29413e-08	1.03031e-06	Acropora hemprichii
9	VDVI	Host protein content	-0.806942	2.29413e-08	1.03031e-06	Acropora hemprichii
10	MGRVI	Host protein content	-0.787054	6.66817e-08	1.18256e-06	Acropora hemprichii
11	NGRI	Host protein content	-0.787054	6.66817e-08	1.18256e-06	Acropora hemprichii
12	NDI	Host protein content	0.787054	6.66817e-08	1.18256e-06	Acropora hemprichii
13	OSAVI	Host protein content	-0.781614	8.22915e-08	1.39246e-06	Acropora hemprichii
14	a_index	Host protein content	0.780675	8.51755e-08	2.41977e-06	Acropora hemprichii
15	EVI_2	Host protein content	-0.776173	9.98937e-08	1.71573e-06	Acropora hemprichii
16	SAVI	Host protein content	-0.776173	9.98937e-08	1.71573e-06	Acropora hemprichii
17	g_minus_r	Host protein content	-0.769231	1.25831e-07	3.69183e-06	Acropora hemprichii
18	G_index	Host protein content	-0.767542	1.32833e-07	7.97317e-06	Acropora hemprichii
19	L_index	Host protein content	-0.757036	1.84213e-07	1.23297e-05	Acropora hemprichii
20	R_plus_G	Host protein content	-0.753471	2.05458e-07	1.39701e-05	Acropora hemprichii
21	Grayscale_weight	Host protein content	-0.752533	2.11444e-07	1.4256e-05	Acropora hemprichii
22	DeltaE2000	Host protein content	0.751782	2.16362e-07	1.39701e-05	Acropora hemprichii
23	Grayscale_norm	Host protein content	-0.74878	2.37257e-07	2.2857e-05	Acropora hemprichii
24	DeltaE76	Host protein content	0.746717	2.52864e-07	1.46187e-05	Acropora hemprichii
25	ExR	Host protein content	0.746341	2.5582e-07	7.97317e-06	Acropora hemprichii
26	R_index	Host protein content	-0.743527	2.79242e-07	2.29198e-05	Acropora hemprichii
27	V_hsv	Host protein content	-0.743527	2.79242e-07	2.29198e-05	Acropora hemprichii
28	F_PC1	Host protein content	-0.740713	3.05095e-07	2.29198e-05	Acropora hemprichii
29	int	Host protein content	-0.740713	3.05095e-07	2.51185e-05	Acropora hemprichii
30	Distance	Host protein content	0.738462	3.27753e-07	2.74699e-05	Acropora hemprichii
31	D_toWhite	Host protein content	0.725328	5.06799e-07	1.69457e-05	Acropora hemprichii
32	H_hsv	Host protein content	-0.724765	5.16752e-07	0.0946193	Acropora hemprichii
33	GLI2	Host protein content	-0.723452	5.40881e-07	2.26682e-05	Acropora hemprichii
34	D_toWhite_RGB	Host protein content	0.722326	5.6262e-07	2.74699e-05	Acropora hemprichii
35	R_plus_B	Host protein content	-0.718574	6.42822e-07	5.76934e-05	Acropora hemprichii
36	CIVE_raw	Host protein content	0.717636	6.64901e-07	1.5754e-05	Acropora hemprichii
37	r_norm	Host protein content	0.692871	1.71319e-06	9.51537e-05	Acropora hemprichii
38	B_index	Host protein content	-0.68818	2.06674e-06	0.000227011	Acropora hemprichii
39	redness_index	Host protein content	0.681051	2.75479e-06	0.000530147	Acropora hemprichii
40	r_minus_b	Host protein content	0.61651	3.3729e-05	0.00157073	Acropora hemprichii
41	RGBVI	Host protein content	-0.597373	6.59199e-05	0.000147448	Acropora hemprichii
42	R_minus_G	Host protein content	0.591932	7.92144e-05	0.000684671	Acropora hemprichii
43	S_hsv	Host protein content	0.562101	0.000206074	0.00312631	Acropora hemprichii
44	NRBI	Host protein content	0.562101	0.000206074	0.0038483	Acropora hemprichii
45	KI	Host protein content	-0.562101	0.000206074	0.01802	Acropora hemprichii
46	COM_norm	Host protein content	-0.526266	0.000584662	0.00189639	Acropora hemprichii
47	ExGR	Host protein content	-0.526266	0.000584662	0.00210007	Acropora hemprichii
48	ExG	Host protein content	-0.52045	0.00068562	0.00239719	Acropora hemprichii
49	b_norm	Host protein content	-0.490244	0.00150516	0.0288708	Acropora hemprichii
50	COM_raw	Host protein content	-0.474109	0.00223098	0.011879	Acropora hemprichii
51	WI	Host protein content	-0.454597	0.00350949	0.0275394	Acropora hemprichii
52	hue_angle	Host protein content	-0.454597	0.00350949	0.114566	Acropora hemprichii
53	G_minus_B	Host protein content	-0.341839	0.0314123	0.104294	Acropora hemprichii
54	F_PC2	Host protein content	-0.294747	0.0652003	0.11539	Acropora hemprichii
55	Chroma_index	Host protein content	0.25666	0.109863	0.180661	Acropora hemprichii
56	b_index	Host protein content	-0.133021	0.411835	0.731167	Acropora hemprichii
57	ExB	Host protein content	-0.122326	0.450695	0.652886	Acropora hemprichii
58	NGBI	Host protein content	0.084803	0.601703	0.824769	Acropora hemprichii
59	IPCA	Host protein content	-0.063227	0.697441	0.803406	Acropora hemprichii
60	R_minus_B	Host protein content	-0.0484053	0.766152	0.928449	Acropora hemprichii
61	chroma_index	Host protein content	0.0294559	0.856597	0.869484	Acropora hemprichii
62	g_minus_b	Host protein content	0.0221388	0.892085	0.912816	Acropora hemprichii
63	WI_modified	Host protein content	-0.0204503	0.900308	0.824769	Acropora hemprichii
1	DeltaE76	Symbiont density	0.72247	7.48103e-07	1.23888e-06	Stylophora pistillata
2	D_toWhite	Symbiont density	0.717611	8.89167e-07	1.74796e-06	Stylophora pistillata
3	MGRVI	Symbiont density	-0.71498	9.78454e-07	1.21138e-06	Stylophora pistillata
4	OSAVI	Symbiont density	-0.71498	9.78454e-07	1.21138e-06	Stylophora pistillata
5	NDI	Symbiont density	0.71498	9.78454e-07	1.21138e-06	Stylophora pistillata
6	NGRI	Symbiont density	-0.71498	9.78454e-07	1.21138e-06	Stylophora pistillata
7	EVI_2	Symbiont density	-0.713968	1.01552e-06	1.21138e-06	Stylophora pistillata
8	SAVI	Symbiont density	-0.713968	1.01552e-06	1.21138e-06	Stylophora pistillata
9	VARI	Symbiont density	-0.711943	1.09455e-06	2.00912e-06	Stylophora pistillata
10	Distance	Symbiont density	0.709312	1.20793e-06	2.78372e-06	Stylophora pistillata
11	D_toWhite_RGB	Symbiont density	0.697368	1.91424e-06	4.10903e-06	Stylophora pistillata
12	g_minus_r	Symbiont density	-0.696964	1.94493e-06	1.23888e-06	Stylophora pistillata
13	redness_index	Symbiont density	0.696356	1.99194e-06	0.000107158	Stylophora pistillata
14	B_index	Symbiont density	-0.695547	2.05651e-06	1.21138e-06	Stylophora pistillata
15	GLI2	Symbiont density	-0.693927	2.19233e-06	1.39154e-06	Stylophora pistillata
16	ExR	Symbiont density	0.693725	2.20995e-06	1.23888e-06	Stylophora pistillata
17	r_minus_b	Symbiont density	0.692713	2.30034e-06	2.32981e-06	Stylophora pistillata
18	b_norm	Symbiont density	-0.688462	2.72392e-06	3.17265e-06	Stylophora pistillata
19	R_plus_B	Symbiont density	-0.688259	2.74599e-06	4.48611e-06	Stylophora pistillata
20	r_norm	Symbiont density	0.688057	2.76825e-06	1.74796e-06	Stylophora pistillata
21	DeltaE2000	Symbiont density	0.68664	2.92929e-06	4.48611e-06	Stylophora pistillata
22	S_hsv	Symbiont density	0.683806	3.28057e-06	1.92968e-06	Stylophora pistillata
23	NRBI	Symbiont density	0.683806	3.28057e-06	3.05065e-06	Stylophora pistillata
24	KI	Symbiont density	-0.683806	3.28057e-06	4.10903e-06	Stylophora pistillata
25	ExB	Symbiont density	-0.683806	3.28057e-06	4.48611e-06	Stylophora pistillata
26	WI_modified	Symbiont density	0.682794	3.41612e-06	4.48611e-06	Stylophora pistillata
27	g_minus_b	Symbiont density	0.681579	3.58623e-06	5.39417e-06	Stylophora pistillata
28	F_PC1	Symbiont density	-0.681377	3.6154e-06	7.70494e-06	Stylophora pistillata
29	NGBI	Symbiont density	0.680769	3.70434e-06	7.70494e-06	Stylophora pistillata
30	int	Symbiont density	-0.67753	4.2169e-06	5.62297e-06	Stylophora pistillata
31	RGBVI	Symbiont density	0.673684	4.9175e-06	5.07882e-05	Stylophora pistillata
32	G_index	Symbiont density	-0.666397	6.57123e-06	1.29083e-05	Stylophora pistillata
33	Grayscale_weight	Symbiont density	-0.648178	1.33738e-05	1.83598e-05	Stylophora pistillata
34	L_index	Symbiont density	-0.635425	2.16283e-05	3.09957e-05	Stylophora pistillata
35	ExGR_2	Symbiont density	-0.632186	2.43754e-05	5.73681e-05	Stylophora pistillata
36	a_index	Symbiont density	0.61336	4.78227e-05	0.000115379	Stylophora pistillata
37	VEG	Symbiont density	0.607895	5.77629e-05	0.000980236	Stylophora pistillata
38	VDVI	Symbiont density	0.600202	7.4962e-05	0.000523616	Stylophora pistillata
39	ExG_2	Symbiont density	0.600202	7.4962e-05	0.000523616	Stylophora pistillata
40	g_norm	Symbiont density	0.600202	7.4962e-05	0.000523616	Stylophora pistillata
41	EVI	Symbiont density	-0.598178	8.02043e-05	6.71967e-05	Stylophora pistillata
42	R_plus_G	Symbiont density	-0.597368	8.23931e-05	8.51053e-05	Stylophora pistillata
43	Grayscale_norm	Symbiont density	-0.576923	0.000159188	9.50087e-05	Stylophora pistillata
44	Chroma_index	Symbiont density	0.542105	0.000447353	0.00050514	Stylophora pistillata
45	COM_raw	Symbiont density	0.539271	0.000484393	0.00126077	Stylophora pistillata
46	CIVE_norm	Symbiont density	-0.536842	0.000518304	0.0023544	Stylophora pistillata
47	b_index	Symbiont density	0.533806	0.000563677	0.000586951	Stylophora pistillata
48	R_index	Symbiont density	-0.526721	0.00068366	0.000523616	Stylophora pistillata
49	V_hsv	Symbiont density	-0.526721	0.00068366	0.000523616	Stylophora pistillata
50	G_minus_B	Symbiont density	0.491296	0.00169623	0.00262454	Stylophora pistillata
51	ChOL	Symbiont density	-0.487449	0.00186216	0.000523616	Stylophora pistillata
52	chroma_index	Symbiont density	0.486842	0.00188964	0.00308029	Stylophora pistillata
53	IPCA	Symbiont density	0.482996	0.00207211	0.00311379	Stylophora pistillata
54	R_minus_B	Symbiont density	0.47834	0.00231369	0.00311379	Stylophora pistillata
55	ExG	Symbiont density	0.468623	0.00289931	0.00512482	Stylophora pistillata
56	COM_norm	Symbiont density	0.468623	0.00289931	0.00548872	Stylophora pistillata
57	ExGR	Symbiont density	0.466194	0.00306468	0.00557278	Stylophora pistillata
58	R_minus_G	Symbiont density	0.465385	0.00312161	0.0103194	Stylophora pistillata
59	F_PC2	Symbiont density	0.445951	0.00479741	0.0103194	Stylophora pistillata
60	WI	Symbiont density	0.388462	0.0150835	0.0210305	Stylophora pistillata
61	H_hsv	Symbiont density	0.388462	0.0150835	0.0243314	Stylophora pistillata
62	hue_angle	Symbiont density	0.388462	0.0150835	0.0243314	Stylophora pistillata
63	CIVE_raw	Symbiont density	-0.199798	0.221835	0.456373	Stylophora pistillata
1	D_toWhite	Total Chlorophyll content	0.740688	4.10842e-07	4.64907e-07	Stylophora pistillata
2	DeltaE76	Total Chlorophyll content	0.734818	4.94238e-07	4.64907e-07	Stylophora pistillata
3	EVI_2	Total Chlorophyll content	-0.725709	6.68709e-07	1.55017e-07	Stylophora pistillata
4	SAVI	Total Chlorophyll content	-0.725709	6.68709e-07	1.55017e-07	Stylophora pistillata
5	OSAVI	Total Chlorophyll content	-0.723887	7.12057e-07	1.55017e-07	Stylophora pistillata
6	MGRVI	Total Chlorophyll content	-0.723887	7.12057e-07	1.55017e-07	Stylophora pistillata
7	NDI	Total Chlorophyll content	0.723887	7.12057e-07	1.55017e-07	Stylophora pistillata
8	NGRI	Total Chlorophyll content	-0.723887	7.12057e-07	1.55017e-07	Stylophora pistillata
9	b_norm	Total Chlorophyll content	-0.723482	7.2214e-07	2.11716e-07	Stylophora pistillata
10	redness_index	Total Chlorophyll content	0.723279	7.27246e-07	1.05194e-05	Stylophora pistillata
11	Distance	Total Chlorophyll content	0.721457	7.7518e-07	1.8264e-06	Stylophora pistillata
12	B_index	Total Chlorophyll content	-0.720445	8.03423e-07	1.59869e-07	Stylophora pistillata
13	GLI2	Total Chlorophyll content	-0.719433	8.32885e-07	1.55017e-07	Stylophora pistillata
14	ExB	Total Chlorophyll content	-0.719231	8.38929e-07	3.38398e-07	Stylophora pistillata
15	r_minus_b	Total Chlorophyll content	0.718623	8.5737e-07	1.59869e-07	Stylophora pistillata
16	S_hsv	Total Chlorophyll content	0.718016	8.76286e-07	1.59869e-07	Stylophora pistillata
17	NRBI	Total Chlorophyll content	0.718016	8.76286e-07	2.11716e-07	Stylophora pistillata
18	KI	Total Chlorophyll content	-0.718016	8.76286e-07	1.00455e-06	Stylophora pistillata
19	D_toWhite_RGB	Total Chlorophyll content	0.717814	8.82699e-07	1.8874e-06	Stylophora pistillata
20	NGBI	Total Chlorophyll content	0.716397	9.29151e-07	5.25189e-07	Stylophora pistillata
21	r_norm	Total Chlorophyll content	0.716194	9.36016e-07	1.55017e-07	Stylophora pistillata
22	ExR	Total Chlorophyll content	0.714575	9.93089e-07	1.55017e-07	Stylophora pistillata
23	g_minus_r	Total Chlorophyll content	-0.714575	9.93089e-07	1.55017e-07	Stylophora pistillata
24	WI_modified	Total Chlorophyll content	0.710729	1.14532e-06	3.38398e-07	Stylophora pistillata
25	g_minus_b	Total Chlorophyll content	0.710121	1.17169e-06	3.99529e-07	Stylophora pistillata
26	R_plus_B	Total Chlorophyll content	-0.708907	1.22652e-06	2.33532e-06	Stylophora pistillata
27	F_PC1	Total Chlorophyll content	-0.707287	1.30412e-06	5.28369e-06	Stylophora pistillata
28	RGBVI	Total Chlorophyll content	0.706073	1.3659e-06	3.38591e-06	Stylophora pistillata
29	int	Total Chlorophyll content	-0.701215	1.64717e-06	3.5963e-06	Stylophora pistillata
30	DeltaE2000	Total Chlorophyll content	0.70081	1.6733e-06	4.23522e-06	Stylophora pistillata
31	VARI	Total Chlorophyll content	-0.699798	1.7406e-06	1.00455e-06	Stylophora pistillata
32	G_index	Total Chlorophyll content	-0.687247	2.85913e-06	1.07482e-05	Stylophora pistillata
33	Grayscale_weight	Total Chlorophyll content	-0.67085	5.50576e-06	1.49213e-05	Stylophora pistillata
34	L_index	Total Chlorophyll content	-0.659109	8.75676e-06	2.686e-05	Stylophora pistillata
35	VEG	Total Chlorophyll content	0.655263	1.01748e-05	0.000112561	Stylophora pistillata
36	VDVI	Total Chlorophyll content	0.643117	1.62142e-05	5.97768e-05	Stylophora pistillata
37	ExG_2	Total Chlorophyll content	0.643117	1.62142e-05	5.97768e-05	Stylophora pistillata
38	g_norm	Total Chlorophyll content	0.643117	1.62142e-05	5.97768e-05	Stylophora pistillata
39	R_plus_G	Total Chlorophyll content	-0.621255	3.62091e-05	7.96123e-05	Stylophora pistillata
40	ExGR_2	Total Chlorophyll content	-0.603441	6.72199e-05	6.85101e-05	Stylophora pistillata
41	Grayscale_norm	Total Chlorophyll content	-0.602024	7.05127e-05	0.000102835	Stylophora pistillata
42	CIVE_norm	Total Chlorophyll content	-0.584818	0.000124034	0.0003211	Stylophora pistillata
43	a_index	Total Chlorophyll content	0.577935	0.000154227	5.97768e-05	Stylophora pistillata
44	COM_raw	Total Chlorophyll content	0.568016	0.000209479	0.000267632	Stylophora pistillata
45	EVI	Total Chlorophyll content	-0.556073	0.000299327	0.000114954	Stylophora pistillata
46	R_index	Total Chlorophyll content	-0.554049	0.0003176	0.000549912	Stylophora pistillata
47	V_hsv	Total Chlorophyll content	-0.554049	0.0003176	0.000549912	Stylophora pistillata
48	Chroma_index	Total Chlorophyll content	0.52834	0.000654385	0.00011413	Stylophora pistillata
49	b_index	Total Chlorophyll content	0.518219	0.00085742	0.000147747	Stylophora pistillata
50	ChOL	Total Chlorophyll content	-0.511538	0.00102052	0.000763556	Stylophora pistillata
51	ExG	Total Chlorophyll content	0.5	0.00136815	0.00126041	Stylophora pistillata
52	COM_norm	Total Chlorophyll content	0.5	0.00136815	0.00136034	Stylophora pistillata
53	ExGR	Total Chlorophyll content	0.497571	0.0014535	0.0014026	Stylophora pistillata
54	G_minus_B	Total Chlorophyll content	0.486842	0.00188964	0.00071987	Stylophora pistillata
55	chroma_index	Total Chlorophyll content	0.473684	0.00257981	0.000995891	Stylophora pistillata
56	IPCA	Total Chlorophyll content	0.469231	0.00285922	0.00101654	Stylophora pistillata
57	R_minus_B	Total Chlorophyll content	0.465992	0.00307883	0.00101654	Stylophora pistillata
58	F_PC2	Total Chlorophyll content	0.432996	0.00630995	0.0037955	Stylophora pistillata
59	H_hsv	Total Chlorophyll content	0.424494	0.00751407	0.00637269	Stylophora pistillata
60	hue_angle	Total Chlorophyll content	0.424494	0.00751407	0.00637269	Stylophora pistillata
61	WI	Total Chlorophyll content	0.424494	0.00751407	0.0063937	Stylophora pistillata
62	R_minus_G	Total Chlorophyll content	0.419028	0.0083891	0.00565896	Stylophora pistillata
63	CIVE_raw	Total Chlorophyll content	-0.218421	0.181025	0.265835	Stylophora pistillata
1	VEG	FvFm	0.782045	4.13645e-09	8.04397e-09	Stylophora pistillata
2	ExB	FvFm	-0.76634	1.29618e-08	1.09506e-09	Stylophora pistillata
3	RGBVI	FvFm	0.765428	1.3813e-08	1.09506e-09	Stylophora pistillata
4	NGBI	FvFm	0.764516	1.47159e-08	1.09506e-09	Stylophora pistillata
5	VDVI	FvFm	0.760767	1.90357e-08	2.52159e-09	Stylophora pistillata
6	g_norm	FvFm	0.760767	1.90357e-08	2.52159e-09	Stylophora pistillata
7	ExG_2	FvFm	0.760767	1.90357e-08	2.52159e-09	Stylophora pistillata
8	WI_modified	FvFm	0.760057	1.99751e-08	1.09844e-09	Stylophora pistillata
9	g_minus_b	FvFm	0.75722	2.41803e-08	1.09506e-09	Stylophora pistillata
10	b_norm	FvFm	-0.75722	2.41803e-08	1.4309e-09	Stylophora pistillata
11	NRBI	FvFm	0.755599	2.69386e-08	1.61403e-09	Stylophora pistillata
12	S_hsv	FvFm	0.755599	2.69386e-08	3.29063e-09	Stylophora pistillata
13	KI	FvFm	-0.755599	2.69386e-08	4.64066e-07	Stylophora pistillata
14	r_norm	FvFm	0.751039	3.63418e-08	4.04746e-09	Stylophora pistillata
15	r_minus_b	FvFm	0.749317	4.06267e-08	2.25733e-09	Stylophora pistillata
16	redness_index	FvFm	0.746175	4.96697e-08	1.46608e-08	Stylophora pistillata
17	CIVE_norm	FvFm	-0.737056	8.76004e-08	1.67836e-08	Stylophora pistillata
18	GLI2	FvFm	-0.735637	9.54852e-08	1.04474e-08	Stylophora pistillata
19	B_index	FvFm	-0.723377	1.96734e-07	4.91196e-08	Stylophora pistillata
20	ExR	FvFm	0.722262	2.09701e-07	2.98265e-08	Stylophora pistillata
21	g_minus_r	FvFm	-0.712433	3.63451e-07	9.47529e-08	Stylophora pistillata
22	OSAVI	FvFm	-0.692573	1.03376e-06	4.64066e-07	Stylophora pistillata
23	NDI	FvFm	0.692573	1.03376e-06	6.39466e-07	Stylophora pistillata
24	NGRI	FvFm	-0.692573	1.03376e-06	6.39466e-07	Stylophora pistillata
25	MGRVI	FvFm	-0.692573	1.03376e-06	6.39945e-07	Stylophora pistillata
26	EVI_2	FvFm	-0.691965	1.06598e-06	2.96064e-07	Stylophora pistillata
27	SAVI	FvFm	-0.691965	1.06598e-06	2.98711e-07	Stylophora pistillata
28	COM_raw	FvFm	0.683758	1.60191e-06	1.3789e-07	Stylophora pistillata
29	D_toWhite	FvFm	0.677577	2.15858e-06	1.03063e-06	Stylophora pistillata
30	D_toWhite_RGB	FvFm	0.668356	3.325e-06	4.68446e-06	Stylophora pistillata
31	R_plus_B	FvFm	-0.668153	3.35616e-06	3.82631e-06	Stylophora pistillata
32	DeltaE76	FvFm	0.654069	6.30944e-06	2.45587e-06	Stylophora pistillata
33	int	FvFm	-0.653866	6.3655e-06	8.62949e-06	Stylophora pistillata
34	ExG	FvFm	0.650218	7.45585e-06	1.03063e-06	Stylophora pistillata
35	COM_norm	FvFm	0.650218	7.45585e-06	1.05613e-06	Stylophora pistillata
36	F_PC1	FvFm	-0.649408	7.72027e-06	1.39668e-05	Stylophora pistillata
37	Distance	FvFm	0.647482	8.38305e-06	8.56228e-06	Stylophora pistillata
38	ExGR	FvFm	0.647178	8.49233e-06	1.16556e-06	Stylophora pistillata
39	VARI	FvFm	-0.62671	1.96829e-05	7.28459e-05	Stylophora pistillata
40	DeltaE2000	FvFm	0.617287	2.84157e-05	3.28989e-05	Stylophora pistillata
41	Grayscale_weight	FvFm	-0.608877	3.9047e-05	5.70574e-05	Stylophora pistillata
42	G_index	FvFm	-0.608674	3.93428e-05	5.70574e-05	Stylophora pistillata
43	L_index	FvFm	-0.592056	7.18078e-05	0.000109077	Stylophora pistillata
44	Chroma_index	FvFm	0.586179	8.81421e-05	5.45037e-06	Stylophora pistillata
45	hue_angle	FvFm	0.584761	9.25577e-05	3.82631e-06	Stylophora pistillata
46	H_hsv	FvFm	0.584761	9.25577e-05	3.82631e-06	Stylophora pistillata
47	WI	FvFm	0.584761	9.25577e-05	6.57051e-06	Stylophora pistillata
48	b_index	FvFm	0.580201	0.00010814	5.35866e-06	Stylophora pistillata
49	G_minus_B	FvFm	0.5725	0.000139912	1.1666e-05	Stylophora pistillata
50	R_plus_G	FvFm	-0.546155	0.000322364	0.00031626	Stylophora pistillata
51	chroma_index	FvFm	0.543318	0.000351247	7.44095e-05	Stylophora pistillata
52	IPCA	FvFm	0.537846	0.000413576	8.42288e-05	Stylophora pistillata
53	R_minus_B	FvFm	0.534198	0.00046045	8.57359e-05	Stylophora pistillata
54	Grayscale_norm	FvFm	-0.521634	0.000660418	0.000568127	Stylophora pistillata
55	F_PC2	FvFm	0.513325	0.000832006	0.000258637	Stylophora pistillata
56	a_index	FvFm	0.495998	0.00132225	0.000615371	Stylophora pistillata
57	V_hsv	FvFm	-0.478266	0.00207302	0.00175317	Stylophora pistillata
58	R_index	FvFm	-0.478266	0.00207302	0.00175317	Stylophora pistillata
59	ExGR_2	FvFm	-0.47249	0.00238784	0.00740454	Stylophora pistillata
60	R_minus_G	FvFm	0.412605	0.00904553	0.00647908	Stylophora pistillata
61	ChOL	FvFm	-0.404803	0.010582	0.0118375	Stylophora pistillata
62	EVI	FvFm	-0.38089	0.0167468	0.0134291	Stylophora pistillata
63	CIVE_raw	FvFm	-0.379573	0.0171598	0.00539181	Stylophora pistillata
1	VEG	Host protein content	0.772672	1.61892e-07	3.15852e-07	Stylophora pistillata
2	VDVI	Host protein content	0.769433	1.77883e-07	2.38106e-07	Stylophora pistillata
3	g_norm	Host protein content	0.769433	1.77883e-07	2.38106e-07	Stylophora pistillata
4	ExG_2	Host protein content	0.769433	1.77883e-07	2.38106e-07	Stylophora pistillata
5	RGBVI	Host protein content	0.768421	1.8315e-07	1.7987e-07	Stylophora pistillata
6	ExB	Host protein content	-0.764372	2.0566e-07	1.7987e-07	Stylophora pistillata
7	NGBI	Host protein content	0.763765	2.09252e-07	1.7987e-07	Stylophora pistillata
8	WI_modified	Host protein content	0.76336	2.1168e-07	1.85508e-07	Stylophora pistillata
9	g_minus_b	Host protein content	0.7583	2.44513e-07	1.7987e-07	Stylophora pistillata
10	b_norm	Host protein content	-0.757895	2.47356e-07	1.85508e-07	Stylophora pistillata
11	NRBI	Host protein content	0.753644	2.79451e-07	1.85863e-07	Stylophora pistillata
12	S_hsv	Host protein content	0.753644	2.79451e-07	2.87586e-07	Stylophora pistillata
13	KI	Host protein content	-0.753644	2.79451e-07	8.3911e-06	Stylophora pistillata
14	CIVE_norm	Host protein content	-0.744534	3.65386e-07	7.81575e-07	Stylophora pistillata
15	r_norm	Host protein content	0.74251	3.88509e-07	2.87586e-07	Stylophora pistillata
16	redness_index	Host protein content	0.737854	4.48763e-07	4.32214e-07	Stylophora pistillata
17	r_minus_b	Host protein content	0.737247	4.57436e-07	2.27366e-07	Stylophora pistillata
18	GLI2	Host protein content	-0.730162	5.75424e-07	5.00373e-07	Stylophora pistillata
19	ExR	Host protein content	0.711943	1.09455e-06	1.0456e-06	Stylophora pistillata
20	COM_raw	Host protein content	0.706883	1.32436e-06	2.66998e-06	Stylophora pistillata
21	g_minus_r	Host protein content	-0.696761	1.96047e-06	2.44898e-06	Stylophora pistillata
22	B_index	Host protein content	-0.692105	2.35641e-06	6.04996e-06	Stylophora pistillata
23	OSAVI	Host protein content	-0.679757	3.85746e-06	7.69919e-06	Stylophora pistillata
24	NDI	Host protein content	0.679757	3.85746e-06	8.79436e-06	Stylophora pistillata
25	NGRI	Host protein content	-0.679757	3.85746e-06	8.79436e-06	Stylophora pistillata
26	MGRVI	Host protein content	-0.679757	3.85746e-06	8.79436e-06	Stylophora pistillata
27	EVI_2	Host protein content	-0.67834	4.0825e-06	5.67771e-06	Stylophora pistillata
28	SAVI	Host protein content	-0.67834	4.0825e-06	5.67771e-06	Stylophora pistillata
29	ExG	Host protein content	0.673077	5.03814e-06	8.79436e-06	Stylophora pistillata
30	COM_norm	Host protein content	0.673077	5.03814e-06	8.79436e-06	Stylophora pistillata
31	ExGR	Host protein content	0.668219	6.11315e-06	9.22351e-06	Stylophora pistillata
32	G_minus_B	Host protein content	0.620243	3.75372e-05	2.97048e-05	Stylophora pistillata
33	Chroma_index	Host protein content	0.619231	3.891e-05	1.90616e-05	Stylophora pistillata
34	D_toWhite	Host protein content	0.616194	4.33096e-05	6.9995e-05	Stylophora pistillata
35	b_index	Host protein content	0.614575	4.58383e-05	1.90616e-05	Stylophora pistillata
36	DeltaE76	Host protein content	0.611943	5.02371e-05	9.24779e-05	Stylophora pistillata
37	R_plus_B	Host protein content	-0.608907	5.57906e-05	0.000173964	Stylophora pistillata
38	hue_angle	Host protein content	0.606883	5.97987e-05	4.08205e-05	Stylophora pistillata
39	H_hsv	Host protein content	0.606883	5.97987e-05	4.08205e-05	Stylophora pistillata
40	WI	Host protein content	0.606883	5.97987e-05	6.05597e-05	Stylophora pistillata
41	D_toWhite_RGB	Host protein content	0.601012	7.29539e-05	0.000225124	Stylophora pistillata
42	VARI	Host protein content	-0.600405	7.44553e-05	0.000334687	Stylophora pistillata
43	int	Host protein content	-0.597571	8.18409e-05	0.000316996	Stylophora pistillata
44	F_PC1	Host protein content	-0.58664	0.000116995	0.00045144	Stylophora pistillata
45	Distance	Host protein content	0.584818	0.000124034	0.000268014	Stylophora pistillata
46	chroma_index	Host protein content	0.580972	0.000140171	0.000113613	Stylophora pistillata
47	R_minus_B	Host protein content	0.576113	0.00016326	0.000125504	Stylophora pistillata
48	IPCA	Host protein content	0.575709	0.000165332	0.000124744	Stylophora pistillata
49	F_PC2	Host protein content	0.562146	0.000250043	0.000285005	Stylophora pistillata
50	DeltaE2000	Host protein content	0.546559	0.00039426	0.000857861	Stylophora pistillata
51	G_index	Host protein content	-0.543725	0.000427347	0.00119546	Stylophora pistillata
52	Grayscale_weight	Host protein content	-0.536032	0.000530072	0.0012236	Stylophora pistillata
53	L_index	Host protein content	-0.521862	0.000778635	0.00199507	Stylophora pistillata
54	a_index	Host protein content	0.487652	0.00185309	0.000788214	Stylophora pistillata
55	R_plus_G	Host protein content	-0.475304	0.00248434	0.00464444	Stylophora pistillata
56	CIVE_raw	Host protein content	-0.459109	0.0035953	0.00564706	Stylophora pistillata
57	Grayscale_norm	Host protein content	-0.450202	0.00437549	0.00729078	Stylophora pistillata
58	ExGR_2	Host protein content	-0.437652	0.0057245	0.0138172	Stylophora pistillata
59	R_minus_G	Host protein content	0.415992	0.00891224	0.00464444	Stylophora pistillata
60	R_index	Host protein content	-0.395344	0.0132731	0.0160034	Stylophora pistillata
61	V_hsv	Host protein content	-0.395344	0.0132731	0.0160034	Stylophora pistillata
62	EVI	Host protein content	-0.345951	0.031559	0.023394	Stylophora pistillata
63	ChOL	Host protein content	-0.298785	0.0650173	0.055603	Stylophora pistillata

## Sheet: Table S3
Table S3. Ranking of color indices based on their correlation strength in symbiont density and total chlorophyll content.
Index	Species	p_abs_mean_ac	p_spearman_cells_cm2	p_spearman_total_chl_cm2	p_adj_BH_cells_cm2	p_adj_BH_total_chl_cm2
DeltaE76	Acropora hemprichii	0.787211	0.829831	0.861726	1.10669e-09	4.03452e-11
DeltaE76	Stylophora pistillata	0.787211	0.72247	0.734818	1.29787e-06	4.63853e-07
D_toWhite	Acropora hemprichii	0.787183	0.829268	0.861163	1.10669e-09	4.03452e-11
D_toWhite	Stylophora pistillata	0.787183	0.717611	0.740688	1.83119e-06	4.63853e-07
Distance	Acropora hemprichii	0.78227	0.832458	0.865854	1.3062e-09	4.37324e-11
Distance	Stylophora pistillata	0.78227	0.709312	0.721457	2.91628e-06	1.83684e-06
NDI	Acropora hemprichii	0.779557	0.839212	0.84015	3.22488e-10	4.03452e-11
NDI	Stylophora pistillata	0.779557	0.71498	0.723887	1.26907e-06	1.62398e-07
NGRI	Acropora hemprichii	0.779557	-0.839212	-0.84015	3.22488e-10	4.03452e-11
NGRI	Stylophora pistillata	0.779557	-0.71498	-0.723887	1.26907e-06	1.62398e-07
MGRVI	Acropora hemprichii	0.779557	-0.839212	-0.84015	4.21642e-10	4.30747e-11
MGRVI	Stylophora pistillata	0.779557	-0.71498	-0.723887	1.26907e-06	1.62398e-07
OSAVI	Acropora hemprichii	0.77937	-0.839962	-0.838649	3.22488e-10	4.26295e-11
OSAVI	Stylophora pistillata	0.77937	-0.71498	-0.723887	1.26907e-06	1.62398e-07
D_toWhite_RGB	Acropora hemprichii	0.777951	0.833771	0.862852	1.29221e-09	4.34699e-11
D_toWhite_RGB	Stylophora pistillata	0.777951	0.697368	0.717814	4.10903e-06	1.90123e-06
SAVI	Acropora hemprichii	0.77793	-0.836773	-0.835272	3.22488e-10	4.37324e-11
SAVI	Stylophora pistillata	0.77793	-0.713968	-0.725709	1.26907e-06	1.62398e-07
EVI_2	Acropora hemprichii	0.77793	-0.836773	-0.835272	3.22488e-10	4.37324e-11
EVI_2	Stylophora pistillata	0.77793	-0.713968	-0.725709	1.26907e-06	1.62398e-07
DeltaE2000	Acropora hemprichii	0.777772	0.844465	0.879174	3.22962e-09	6.88361e-11
DeltaE2000	Stylophora pistillata	0.777772	0.68664	0.70081	4.35161e-06	4.15065e-06
F_PC1	Acropora hemprichii	0.772354	-0.831707	-0.869043	1.29221e-09	4.03452e-11
F_PC1	Stylophora pistillata	0.772354	-0.681377	-0.707287	7.55107e-06	5.18934e-06
R_plus_B	Acropora hemprichii	0.771102	-0.825516	-0.861726	1.89852e-09	7.02577e-11
R_plus_B	Stylophora pistillata	0.771102	-0.688259	-0.708907	4.35161e-06	2.27177e-06
int	Acropora hemprichii	0.769592	-0.831707	-0.867917	1.29221e-09	4.26295e-11
int	Stylophora pistillata	0.769592	-0.67753	-0.701215	5.48447e-06	3.51638e-06
g_minus_r	Acropora hemprichii	0.76705	-0.827392	-0.829268	3.22488e-10	7.02577e-11
g_minus_r	Stylophora pistillata	0.76705	-0.696964	-0.714575	1.29787e-06	1.62398e-07
G_index	Acropora hemprichii	0.766694	-0.841839	-0.871295	1.10669e-09	2.63277e-11
G_index	Stylophora pistillata	0.766694	-0.666397	-0.687247	1.26778e-05	1.05976e-05
ExR	Acropora hemprichii	0.765771	0.826829	0.827955	3.84218e-10	1.64384e-10
ExR	Stylophora pistillata	0.765771	0.693725	0.714575	1.29787e-06	1.62398e-07
VARI	Acropora hemprichii	0.7618	-0.819325	-0.816135	1.3062e-09	4.37324e-11
VARI	Stylophora pistillata	0.7618	-0.711943	-0.699798	2.10479e-06	1.00854e-06
GLI2	Acropora hemprichii	0.760423	-0.816886	-0.811445	6.64949e-10	7.32184e-10
GLI2	Stylophora pistillata	0.760423	-0.693927	-0.719433	1.45781e-06	1.62398e-07
B_index	Acropora hemprichii	0.759017	-0.804315	-0.81576	1.2911e-08	4.3744e-09
B_index	Stylophora pistillata	0.759017	-0.695547	-0.720445	1.26907e-06	1.67482e-07
Grayscale_weight	Acropora hemprichii	0.758275	-0.839962	-0.874109	1.10669e-09	2.63277e-11
Grayscale_weight	Stylophora pistillata	0.758275	-0.648178	-0.67085	1.80684e-05	1.47386e-05
L_coral	Acropora hemprichii	0.750885	-0.837899	-0.871107	1.10669e-09	2.29349e-11
L_coral	Stylophora pistillata	0.750885	-0.635425	-0.659109	3.05616e-05	2.65758e-05
redness_index	Acropora hemprichii	0.744965	0.78743	0.772795	7.87343e-09	1.64904e-07
redness_index	Stylophora pistillata	0.744965	0.696356	0.723279	0.000106648	1.03525e-05
r_norm	Acropora hemprichii	0.744121	0.793996	0.778236	2.106e-09	9.74578e-09
r_norm	Stylophora pistillata	0.744121	0.688057	0.716194	1.83119e-06	1.62398e-07
R_plus_G	Acropora hemprichii	0.731767	-0.837336	-0.871107	1.10669e-09	2.29349e-11
R_plus_G	Stylophora pistillata	0.731767	-0.597368	-0.621255	8.44654e-05	7.94317e-05
r_minus_b	Acropora hemprichii	0.716811	0.734897	0.721013	1.34528e-07	8.56425e-07
r_minus_b	Stylophora pistillata	0.716811	0.692713	0.718623	2.44076e-06	1.67482e-07
Grayscale_norm	Acropora hemprichii	0.716547	-0.822514	-0.864728	1.29221e-09	2.63277e-11
Grayscale_norm	Stylophora pistillata	0.716547	-0.576923	-0.602024	9.44287e-05	0.000102721
ExGR_2	Acropora hemprichii	0.714113	-0.812008	-0.808818	6.68251e-10	4.60742e-11
ExGR_2	Stylophora pistillata	0.714113	-0.632186	-0.603441	5.67611e-05	6.82714e-05
S_hsv	Acropora hemprichii	0.698532	0.706191	0.686116	6.90028e-07	3.25967e-06
S_hsv	Stylophora pistillata	0.698532	0.683806	0.718016	2.02157e-06	1.67482e-07
NRBI	Acropora hemprichii	0.698532	0.706191	0.686116	8.88531e-07	5.51334e-06
NRBI	Stylophora pistillata	0.698532	0.683806	0.718016	3.02771e-06	2.07594e-07
KI	Acropora hemprichii	0.698532	-0.706191	-0.686116	8.06488e-05	0.000111658
KI	Stylophora pistillata	0.698532	-0.683806	-0.718016	4.10903e-06	1.00854e-06
R_index	Acropora hemprichii	0.688766	-0.807692	-0.866604	1.33911e-09	2.29349e-11
R_index	Stylophora pistillata	0.688766	-0.526721	-0.554049	0.000525694	0.000553506
V_hsv	Acropora hemprichii	0.688766	-0.807692	-0.866604	1.33911e-09	2.29349e-11
V_hsv	Stylophora pistillata	0.688766	-0.526721	-0.554049	0.000525694	0.000553506
ChOL	Acropora hemprichii	0.665882	-0.821201	-0.84334	5.94622e-09	6.88361e-11
ChOL	Stylophora pistillata	0.665882	-0.487449	-0.511538	0.000525694	0.000769731
b_norm	Acropora hemprichii	0.663586	-0.631144	-0.611257	2.61088e-05	0.000166508
b_norm	Stylophora pistillata	0.663586	-0.688462	-0.723482	3.15755e-06	2.07935e-07
VEG	Acropora hemprichii	0.657769	-0.669418	-0.698499	6.50759e-07	2.34646e-08
VEG	Stylophora pistillata	0.657769	0.607895	0.655263	0.000985837	0.000112561
EVI	Acropora hemprichii	0.647334	-0.703002	-0.732083	5.41612e-07	1.50323e-08
EVI	Stylophora pistillata	0.647334	-0.598178	-0.556073	6.65913e-05	0.000115192
VDVI	Acropora hemprichii	0.643522	-0.649719	-0.681051	9.32188e-07	6.43718e-08
VDVI	Stylophora pistillata	0.643522	0.600202	0.643117	0.000525694	5.94921e-05
ExG_2	Acropora hemprichii	0.643522	-0.649719	-0.681051	1.01961e-06	6.91419e-08
ExG_2	Stylophora pistillata	0.643522	0.600202	0.643117	0.000525694	5.94921e-05
g_norm	Acropora hemprichii	0.643522	-0.649719	-0.681051	1.01961e-06	6.91419e-08
g_norm	Stylophora pistillata	0.643522	0.600202	0.643117	0.000525694	5.94921e-05
CIVE_norm	Acropora hemprichii	0.622582	0.670356	0.698311	1.84032e-07	1.09411e-08
CIVE_norm	Stylophora pistillata	0.622582	-0.536842	-0.584818	0.00237165	0.00032266
a_coral	Acropora hemprichii	0.588865	0.590807	0.573358	8.98371e-05	8.76471e-05
a_coral	Stylophora pistillata	0.588865	0.61336	0.577935	0.000114977	5.94921e-05
RGBVI	Acropora hemprichii	0.553523	-0.398874	-0.43546	0.00648685	0.000884788
RGBVI	Stylophora pistillata	0.553523	0.673684	0.706073	5.01663e-05	3.30251e-06
H_hsv	Acropora hemprichii	0.547047	-0.675985	-0.69925	0.00694058	0.00549587
H_hsv	Stylophora pistillata	0.547047	0.388462	0.424494	0.0243136	0.00636321
ExB	Acropora hemprichii	0.521819	-0.365103	-0.319137	0.0233747	0.0742795
ExB	Stylophora pistillata	0.521819	-0.683806	-0.719231	4.35161e-06	3.34817e-07
NGBI	Acropora hemprichii	0.501918	0.328143	0.282364	0.051159	0.150094
NGBI	Stylophora pistillata	0.501918	0.680769	0.716397	7.55107e-06	5.25189e-07
g_minus_b	Acropora hemprichii	0.472644	0.270919	0.227955	0.132115	0.294305
g_minus_b	Stylophora pistillata	0.472644	0.681579	0.710121	5.24739e-06	3.96525e-07
WI_modified	Acropora hemprichii	0.455838	0.238086	0.191745	0.158534	0.345262
WI_modified	Stylophora pistillata	0.455838	0.682794	0.710729	4.35161e-06	3.34817e-07
Chroma_coral	Acropora hemprichii	0.436983	0.375797	0.301689	0.0279741	0.114391
Chroma_coral	Stylophora pistillata	0.436983	0.542105	0.52834	0.000503994	0.000114251
R_minus_G	Acropora hemprichii	0.422135	0.442589	0.361538	0.00648398	0.0231421
R_minus_G	Stylophora pistillata	0.422135	0.465385	0.419028	0.0104563	0.00573406
COM_raw	Acropora hemprichii	0.366409	-0.168105	-0.190244	0.394574	0.250568
COM_raw	Stylophora pistillata	0.366409	0.539271	0.568016	0.00126901	0.000268694
COM_norm	Acropora hemprichii	0.358619	-0.221576	-0.244278	0.127856	0.0665725
COM_norm	Stylophora pistillata	0.358619	0.468623	0.5	0.00555181	0.00137598
ExGR	Acropora hemprichii	0.357405	-0.221576	-0.244278	0.134845	0.0726308
ExGR	Stylophora pistillata	0.357405	0.466194	0.497571	0.00564025	0.00141958
CIVE_raw	Acropora hemprichii	0.354648	0.491932	0.508443	0.00154011	0.000340479
CIVE_raw	Stylophora pistillata	0.354648	-0.199798	-0.218421	0.456373	0.265835
ExG	Acropora hemprichii	0.354116	-0.211257	-0.236585	0.147975	0.0792742
ExG	Stylophora pistillata	0.354116	0.468623	0.5	0.00518048	0.0012741
chroma_index	Acropora hemprichii	0.30636	0.185178	0.0797373	0.394574	0.830771
chroma_index	Stylophora pistillata	0.30636	0.486842	0.473684	0.00310745	0.00100467
G_minus_B	Acropora hemprichii	0.298427	-0.0744841	-0.141088	0.730688	0.401106
G_minus_B	Stylophora pistillata	0.298427	0.491296	0.486842	0.00264577	0.000725143
WI	Acropora hemprichii	0.297517	-0.165666	-0.211445	0.420022	0.236266
WI	Stylophora pistillata	0.297517	0.388462	0.424494	0.0213213	0.00638901
hue_angle	Acropora hemprichii	0.297517	-0.165666	-0.211445	0.859442	0.618473
hue_angle	Stylophora pistillata	0.297517	0.388462	0.424494	0.0243136	0.00636321
b_coral	Acropora hemprichii	0.293963	0.0996248	0.0242026	0.420022	0.782214
b_coral	Stylophora pistillata	0.293963	0.533806	0.518219	0.000589803	0.000148196
F_PC2	Acropora hemprichii	0.28484	-0.0876173	-0.172795	0.510305	0.196777
F_PC2	Stylophora pistillata	0.28484	0.445951	0.432996	0.0104563	0.00384369
R_minus_B	Acropora hemprichii	0.282518	0.140901	0.0448405	0.420022	0.850459
R_minus_B	Stylophora pistillata	0.282518	0.47834	0.465992	0.00314556	0.00102691
IPCA	Acropora hemprichii	0.276518	0.125891	0.027955	0.585168	0.891783
IPCA	Stylophora pistillata	0.276518	0.482996	0.469231	0.00314556	0.00102691
